# Supplementary material for: One-step fabrication of robust lithium ion battery separators by polymerization-induced phase separation
Source: Royal Society of Chemistry journal article supplement (doi:10.1039/d1ta10730e), 2022-01-01
Supplement: d1ta10730e1.pdf [file d1ta10730e1.pdf]

## Supplementary Information

### One-step Fabrication of Robust Lithium Ion Battery Separators by Polymerization-Induced Phase Separation

Alexander J. Manly<sup>a</sup> and Wyatt E. Tenhaeff<sup>a,b,\*</sup>

<sup>a</sup>Materials Science Program, University of Rochester, Rochester, New York 14627, United States.

<sup>b</sup>Department of Chemical Engineering and Materials Science Program, University of Rochester,  
Rochester, New York 14627, Unites States.

\*Corresponding author. (wyatt.tenhaeff@rochester.edu)

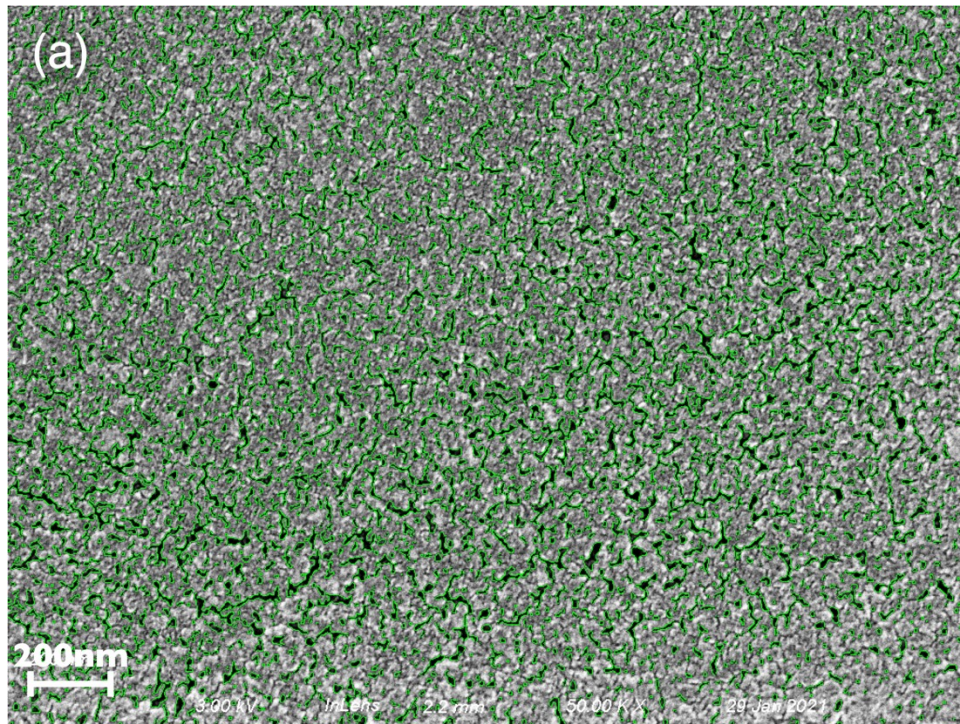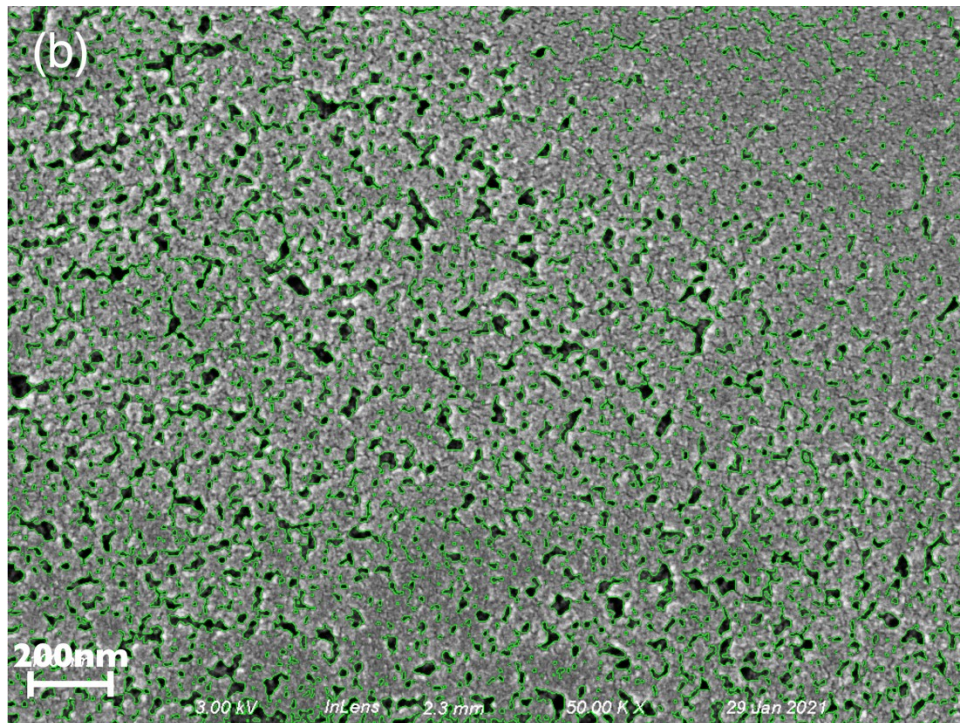

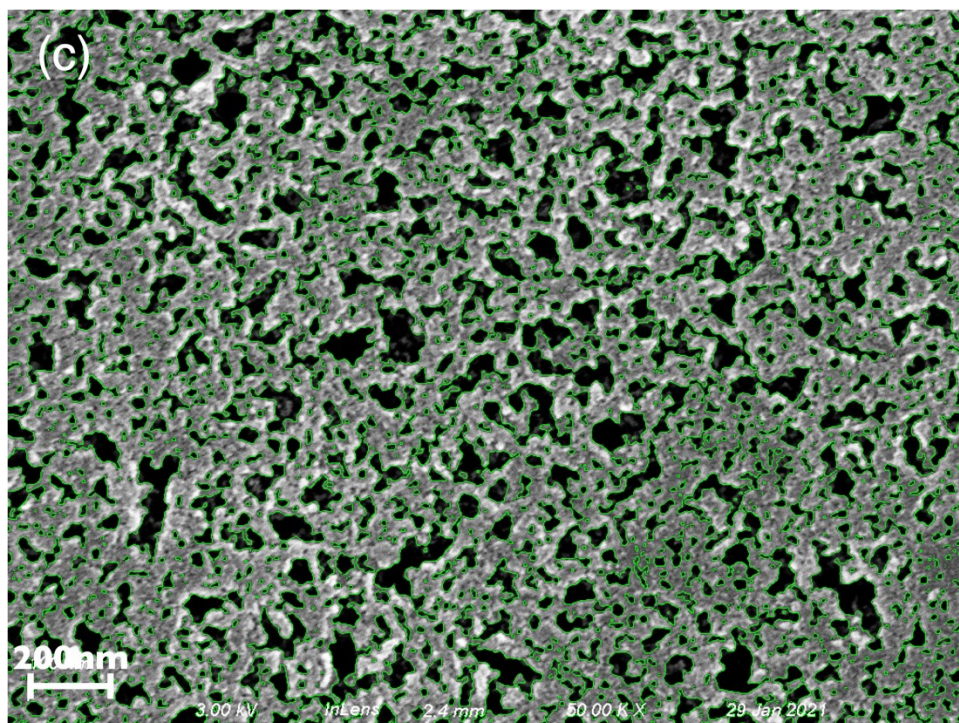

**Fig. S1** SEM images with algorithmically-detected pore contours overlaid in green for (a) pBDDA30, (b) pBDDA40, (c) pBDDA50 and (d) pBDDA60.

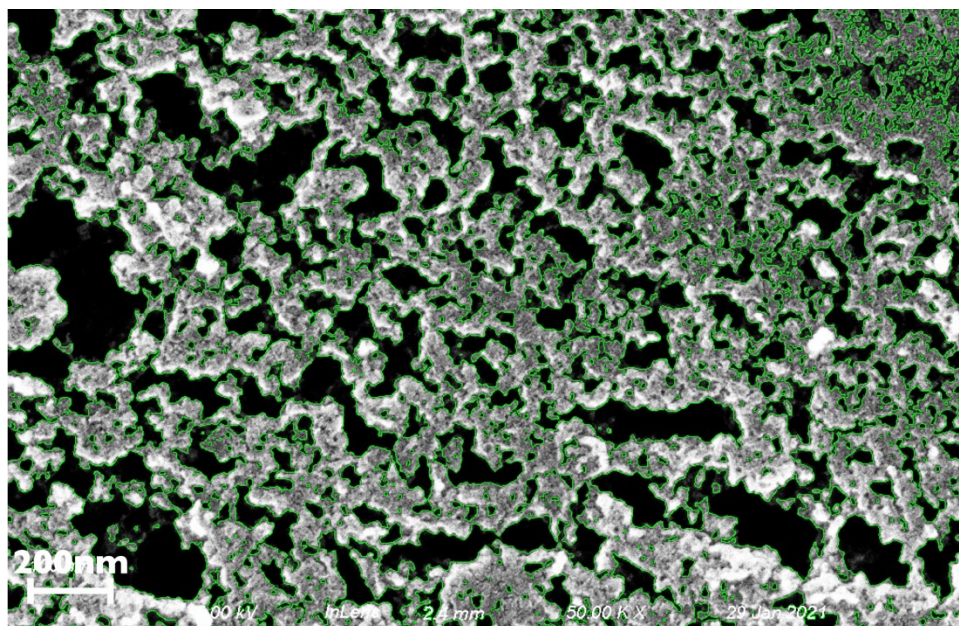

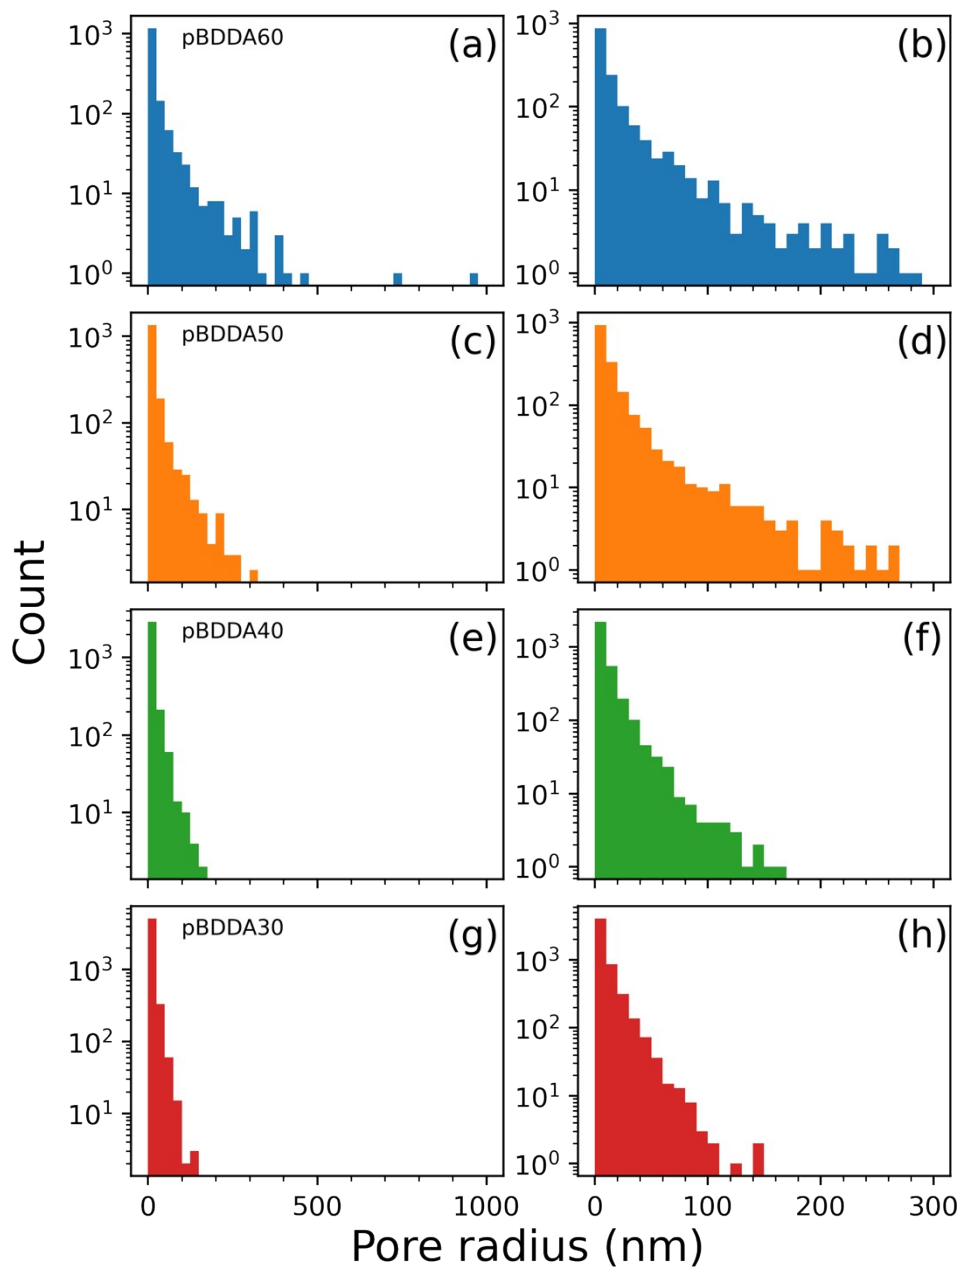

**Fig. S2** Histogram plots for pore size distribution derived from the SEM images of pBDDA samples. Individual plots for (a-b) pBDDA60, (c-d) pBDDA50, (e-f) pBDDA40 and (g-f) pBDDA30 are shown, The plots in the left show the entire range of pore sizes with a bucket width of 25nm. The plots in the right column show only up to 300nm in radius where most of the detected pores are plotted, to achieve a higher resolution – the bucket width is 10nm.

**Table S1** MacMullin numbers ( $N_M$ ) of commercial separators reported in the literature

| Separator                 | Material         | $N_M$            | Reference      |
|---------------------------|------------------|------------------|----------------|
| Celgard C480              | PP/PE/PP         | 7.3              | 63             |
| Celgard H2013             | PP/PE/PP         | 6.9              | 63             |
| Celgard 2320              | PP/PE/PP         | 10               | 63             |
| Celgard 2325              | PP/PE/PP         | 10               | 63             |
| Celgard 2400              | PP               | 13, 15.7, 23     | 64, 62, 55     |
| Celgard 2500              | PP               | 4.5, 8.5, 16, 23 | 63, 62, 64, 55 |
| Celgard 2730              | PE               | 11               | 64             |
| Celgard 3500              | PP               | 6.1              | 63             |
| -                         | HDPE             | 14               | 63             |
| -                         | HDPE             | 16               | 63             |
| Solupor 14P01A            | UHMWPE           | 22, 22.1         | 64, 62         |
| Solupor 7P03A             | UHMWPE           | 13, 4.3          | 64, 62         |
| Solupor 10P05A            | UHMWPE           | 5                | 64             |
| Hipore N962C              | UHMWPE           | 16.1             | 62             |
| Hipore N720               | UHMWPE           | 19.3             | 62             |
| Hipore 6022               | UHMWPE           | 13.4             | 62             |
| Freudenberg<br>FS-3001-30 | PET <sup>‡</sup> | 4.6              | 63             |

<sup>‡</sup>Non-woven separator

Separators were tested in 1.5M LiAsF<sub>6</sub> in THF<sup>55</sup>, 1M LiPF<sub>6</sub> in 1:1 EC:DMC<sup>62,64</sup>, and 1M LiPF<sub>6</sub> in 3:7 EC:DMC<sup>63</sup>.

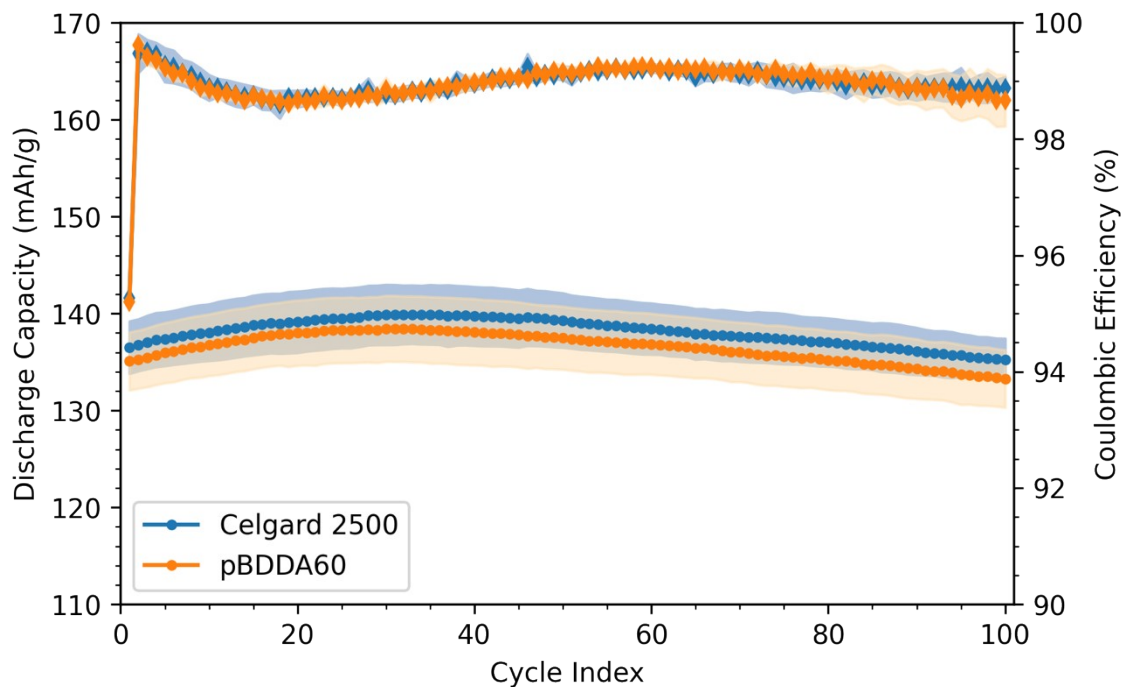

**Fig. S3** Average cycling performance of NMC532/Li metal half-cells with 1M 3:7 v/v/ EC:DMC, cycled at C/3 at 30°C. Five cells were tested and averaged for each material. Celgard 2500 separators were 25 $\mu$ m, while pBDDA60 varied in thickness from 22-40 $\mu$ m with an average thickness of 30.2 $\mu$ m.
